# Supplementary material
Source: HighWire-hosted journal article supplement (http://jech.bmjjournals.com/highwire/filestream/159479/field_highwire_adjunct_files/0/623209webonlytable.pdf)
Supplement: 623209webonlytable.pdf [file 623209webonlytable.pdf]

Web-only supplement.

## Factors affecting in-hospital heat-related mortality: a multi-city case-crossover analysis

**Table** – Distribution (%) of acute clinical conditions by hospital ward, age groups 65+ and 85+ years

|                                                    | Age group 65 - 84 years |                       |                      |                      | Age group 85+ years   |                      |                      |                      |
|----------------------------------------------------|-------------------------|-----------------------|----------------------|----------------------|-----------------------|----------------------|----------------------|----------------------|
|                                                    | General Medicine        | Low-Care              | High-Care            | Intensive Care       | General Medicine      | Low-Care             | High-Care            | Intensive Care       |
| Acute myocardial infarction (ICD-9: 410)           | 1.7                     | 0.9                   | 9.8                  | 14.6                 | 2.7                   | 1.5                  | 16.8                 | 25.9                 |
| Diseases of pulmonary circulation (ICD-9: 415-417) | 1.2                     | 0.6                   | 0.8                  | 0.6                  | 1.0                   | 0.5                  | 0.6                  | 0.6                  |
| Cardiac dysrhythmias (ICD-9: 427)                  | 2.6                     | 3.0                   | 4.0                  | 3.1                  | 3.4                   | 3.4                  | 5.7                  | 3.7                  |
| Heart failure (ICD-9: 428)                         | 5.9                     | 1.6                   | 8.0                  | 3.6                  | 10.7                  | 3.5                  | 17.2                 | 4.8                  |
| Cerebrovascular diseases (ICD-9: 430-438)          | 13.6                    | 8.5                   | 9.2                  | 8.4                  | 19.4                  | 14.8                 | 6.0                  | 6.9                  |
| Pneumonia (ICD-9: 480-486)                         | 4.3                     | 2.1                   | 1.2                  | 2.1                  | 7.9                   | 3.8                  | 2.9                  | 2.3                  |
| Chronic pulmonary diseases (ICD-9: 490-505)        | 1.9                     | 1.0                   | 0.4                  | 2.3                  | 2.3                   | 1.2                  | 1.1                  | 1.4                  |
| Acute and chronic liver diseases (ICD-9: 570-572)  | 3.8                     | 2.8                   | 0.4                  | 0.3                  | 0.9                   | 0.7                  | 0.4                  | 0.1                  |
| Renal failure (ICD-9: 584-588)                     | 2.3                     | 1.1                   | 9.4                  | 0.7                  | 2.8                   | 1.3                  | 10.0                 | 0.4                  |
| Other conditions                                   | 62.8                    | 78.4                  | 56.8                 | 64.3                 | 49.1                  | 69.3                 | 39.3                 | 53.9                 |
| <b>Total (%)</b>                                   | <b>33,294 (100.0)</b>   | <b>18,187 (100.0)</b> | <b>4,503 (100.0)</b> | <b>9,068 (100.0)</b> | <b>20,187 (100.0)</b> | <b>6,112 (100.0)</b> | <b>1,288 (100.0)</b> | <b>1,505 (100.0)</b> |
